# Supplementary material for: Association of Age-Related Macular Degeneration With Risk of All-Cause and Specific-Cause Mortality in the National Health and Nutrition Examination Survey, 2005 to 2008
Source: PubMed Central journal article supplement (PMC6439709; doi:10.1001/jamaophthalmol.2018.6150), 2018-12-20
Supplement: jamaophthalmol-137-248-s001.pdf [file jamaophthalmol-137-248-s001.pdf]

## Supplementary Online Content

Zhu Z, Wang W, Keel S, Zhang J, He M. Association of age-related macular degeneration with risk of all-cause and specific-cause mortality in the National Health and Nutrition Examination Survey, 2005 to 2008. *JAMA Ophthalmol*. Published online December 20, 2018. doi:10.1001/jamaophthalmol.2018.6150

**eFigure.** Schematic Showing Inclusion Criteria for Study Participants

**eTable 1.** Demographic, Health-Related Behaviors and General Health Characteristics of Participants Included and Excluded in the Analyses

**eTable 2.** Cox Proportional Hazards Models for All-Cause Mortality and Fine and Gray Competing Risks Regression Models for Specific-Cause Mortality by Age-Related Macular Degeneration Status Using Inverse Probability Weighting

**eTable 3.** Cox Proportional Hazards Models for All-Cause Mortality and Fine and Gray Competing Risks Regression Models for Specific-Cause Mortality by Age-Related Macular Degeneration Status With Additional Adjustment for Age Squared

**eTable 4.** Summary Description of Previous Studies on the Association Between Age-Related Macular Degeneration and Mortality

This supplementary material has been provided by the authors to give readers additional information about their work.

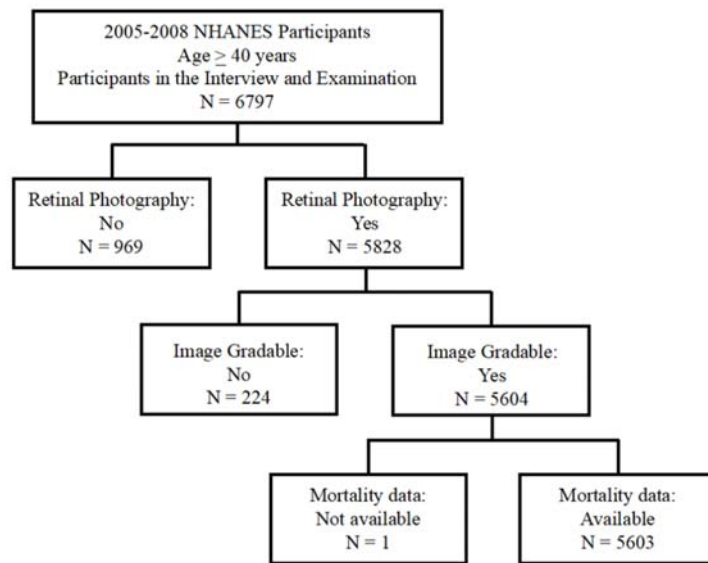

**eFigure.** Schematic Showing Inclusion Criteria for Study Participants

Schematic showing study participants included for the present analysis from the 2005-2008 National Health and Nutrition Examination Survey(NHANES). A total of 5603 participants were included.

**eTable 1.** Demographic, Health-Related Behaviors and General Health Characteristics of Participants Included and Excluded in the Analyses <sup>a</sup>

| Characteristic                   | No. of Excluded Subjects (n = 1194) | No. of Included Subjects (n = 5603) | P Value <sup>b</sup> |
|----------------------------------|-------------------------------------|-------------------------------------|----------------------|
| Age, No. (%)                     |                                     |                                     |                      |
| 40-49                            | 241 (27.4)                          | 1501 (34.6)                         | <b>&lt;.001</b>      |
| 50-59                            | 195 (23.5)                          | 1327 (29.8)                         |                      |
| 60-69                            | 238 (15.5)                          | 1386 (18.8)                         |                      |
| 70-79                            | 237 (15.2)                          | 925 (11.6)                          |                      |
| ≥80                              | 283 (18.4)                          | 464 (5.2)                           |                      |
| Sex, No. (%)                     |                                     |                                     |                      |
| Male                             | 563 (45.2)                          | 2810 (47.4)                         | .23                  |
| Female                           | 631 (54.8)                          | 2793 (52.6)                         |                      |
| Race/ethnicity, No. (%)          |                                     |                                     |                      |
| Non-Hispanic white               | 529 (66.4)                          | 3017 (77.1)                         | <b>&lt;.001</b>      |
| Non-Hispanic black               | 330 (16.2)                          | 1139 (9.6)                          |                      |
| Mexican American                 | 184 (6.2)                           | 864 (5.4)                           |                      |
| Other                            | 151 (11.2)                          | 583 (7.9)                           |                      |
| Educational attainment, No. (%)  |                                     |                                     |                      |
| <high school                     | 498 (28.8)                          | 1643 (18.0)                         | <b>&lt;.001</b>      |
| ≥High school                     | 696 (71.2)                          | 3960 (82.0)                         |                      |
| Marital status, No. (%)          |                                     |                                     |                      |
| Unmarried or other               | 551 (39.3)                          | 2025 (30.9)                         | <b>&lt;.001</b>      |
| Married or living with a partner | 639 (60.7)                          | 3576 (69.1)                         |                      |
| Poverty income ratio, No. (%)    |                                     |                                     |                      |
| Below poverty line (<1.00)       | 216 (13.3)                          | 828 (9.3)                           | <b>.01</b>           |
| At or above poverty line (≥1.00) | 844 (86.7)                          | 4380 (90.7)                         |                      |

|                                              |             |             |                 |
|----------------------------------------------|-------------|-------------|-----------------|
| Smoking status, No. (%)                      |             |             |                 |
| Never                                        | 647 (54.3)  | 2648 (48.5) | .06             |
| Former                                       | 345 (27.8)  | 1812 (30.9) |                 |
| Current                                      | 197 (17.9)  | 1141 (20.6) |                 |
| Alcohol consumption, No. (%)                 |             |             |                 |
| Lifetime abstainer or former                 | 277 (32.3)  | 1358 (20.6) | <b>&lt;.001</b> |
| Current, drinks/wk                           |             |             |                 |
| ≤3                                           | 372 (49.5)  | 2961 (55.4) |                 |
| >3                                           | 126 (18.2)  | 1148 (24.0) |                 |
| Diabetes, No. (%)                            | 343 (25.8)  | 1053 (13.6) | <b>&lt;.001</b> |
| Hypertension, No. (%)                        | 581 (54.4)  | 2758 (43.6) | <b>&lt;.001</b> |
| High total cholesterol level, No. (%)        | 431 (40.0)  | 2131 (37.9) | .33             |
| LDL-C:HDL-C level ratio, mean (SE)           | 2.20 ± 0.04 | 2.30 ± 0.02 | <b>.02</b>      |
| BMI, No. (%)                                 |             |             |                 |
| < 18.5                                       | 24 (2.4)    | 79 (1.3)    | .17             |
| 18.5-30.0                                    | 658 (62.2)  | 3372 (62.0) |                 |
| ≥30.0                                        | 396 (35.4)  | 2109 (36.7) |                 |
| High C-reactive protein level, No. (%)       | 130 (11.8)  | 627 (10.6)  | .34             |
| Depressive symptoms, No. (%)                 | 61 (7.2)    | 463 (7.2)   | .99             |
| Comorbid ocular diseases, No. (%)            | 319 (88.4)  | 1361 (19.3) | <b>&lt;.001</b> |
| Walking disability, No. (%)                  | 307 (21.5)  | 595 (8.2)   | <b>&lt;.001</b> |
| Self-rated health, No. (%)                   |             |             |                 |
| Poor to fair                                 | 303 (30.1)  | 1427 (18.8) | <b>&lt;.001</b> |
| Good to excellent                            | 483 (69.9)  | 4056 (81.2) |                 |
| History of congestive heart failure, No. (%) | 105 (6.8)   | 256 (3.3)   | <b>&lt;.001</b> |
| History of coronary heart disease, No. (%)   | 96 (7.2)    | 319 (4.8)   | <b>.007</b>     |

|                                  |            |            |                 |
|----------------------------------|------------|------------|-----------------|
| History of angina, No. (%)       | 67 (4.8)   | 230 (3.4)  | .07             |
| History of heart attack, No. (%) | 109 (7.6)  | 350 (4.9)  | <b>.002</b>     |
| History of stroke, No. (%)       | 124 (7.8)  | 286 (4.1)  | <b>&lt;.001</b> |
| History of cancer, No. (%)       | 183 (14.9) | 698 (12.2) | .07             |

Abbreviations: AMD, age-related macular degeneration; BMI, body mass index (calculated as weight in kilograms divided by height in meters squared); LDL-C, low-density lipoprotein cholesterol; HDL-C, high-density lipoprotein cholesterol.

<sup>a</sup>All proportions, means, and SEs are weighted estimates of the US population characteristics, taking into account the complex sampling design of the National Health and Nutrition Examination Survey.

<sup>b</sup>All P values were calculated using the unpaired *t* test for continuous variables and the design-adjusted Rao-Scott Pearson  $\chi^2$  test for categorical variables. Boldface indicates statistical significance.

**eTable 2.** Cox Proportional Hazards Models for All-Cause Mortality and Fine and Gray Competing Risks Regression Models for Specific-Cause Mortality by Age-Related Macular Degeneration Status Using Inverse Probability Weighting

| AMD Status          | Mortality <sup>a</sup>           |                                  |                     |                       |                     |                       |                                  |                                  |
|---------------------|----------------------------------|----------------------------------|---------------------|-----------------------|---------------------|-----------------------|----------------------------------|----------------------------------|
|                     | All-Cause                        |                                  | CVD-Specific        |                       | Cancer-Specific     |                       | Not Due to CVD or Cancer         |                                  |
|                     | HR (95% CI)                      | PAR (95% CI), %                  | HR (95% CI)         | PAR (95% CI), %       | HR (95% CI)         | PAR (95% CI), %       | HR (95% CI)                      | PAR (95% CI), %                  |
| None                | 1 [Reference]                    | 1 [Reference]                    | 1 [Reference]       | 1 [Reference]         | 1 [Reference]       | 1 [Reference]         | 1 [Reference]                    | 1 [Reference]                    |
| Any (early or late) | 0.99 (0.76 to 1.29)              | -0.07 (-1.61 to 1.88)            | 0.48 (0.17 to 1.37) | -3.55 (-5.81 to 2.41) | 0.90 (0.44 to 1.84) | -0.69 (-3.87 to 5.25) | 1.39 (0.92 to 2.11)              | 2.53 (-0.54 to 6.84)             |
| Early               | 0.78 (0.56 to 1.07)              | -1.29 (-2.62 to 0.40)            | 0.40 (0.13 to 1.20) | -3.61 (-5.30 to 1.15) | 0.84 (0.40 to 1.77) | -0.91 (-3.58 to 4.25) | 1.00 (0.61 to 1.65)              | 0.01 (-2.33 to 3.64)             |
| Late                | 1.96 (1.06 to 3.62) <sup>b</sup> | 0.76 (0.05 to 2.05) <sup>b</sup> | 0.70 (0.12 to 3.99) | -0.24 (-0.71 to 2.33) | 1.33 (0.19 to 9.46) | 0.27 (-0.65 to 6.34)  | 3.27 (1.43 to 7.47) <sup>b</sup> | 1.79 (0.35 to 4.92) <sup>b</sup> |

Abbreviations: AMD, age-related macular degeneration; CVD, cardiovascular disease; HR, hazard ratio; PAR, population attributable risk.

<sup>a</sup>Adjusted for age, sex, race/ethnicity, educational attainment, marital status, family income, smoking status, alcohol consumption, diabetes, hypertension, high cholesterol level, body mass index, high C-reactive protein level, depressive symptoms, comorbid ocular diseases, walking disability, self-rated health, history of CVD, and cancer.

<sup>b</sup> $P < .05$

**eTable 3.** Cox Proportional Hazards Models for All-Cause Mortality and Fine and Gray Competing Risks Regression Models for Specific-Cause Mortality by Age-Related Macular Degeneration Status with Additional Adjustment for Age Squared

| AMD Status          | Mortality <sup>a</sup>           |                                  |                     |                       |                     |                       |                                  |                                  |
|---------------------|----------------------------------|----------------------------------|---------------------|-----------------------|---------------------|-----------------------|----------------------------------|----------------------------------|
|                     | All-Cause                        |                                  | CVD-Specific        |                       | Cancer-Specific     |                       | Not Due to CVD or Cancer         |                                  |
|                     | HR (95% CI)                      | PAR (95% CI), %                  | HR (95% CI)         | PAR (95% CI), %       | HR (95% CI)         | PAR (95% CI), %       | HR (95% CI)                      | PAR (95% CI), %                  |
| None                | 1 [Reference]                    | 1 [Reference]                    | 1 [Reference]       | 1 [Reference]         | 1 [Reference]       | 1 [Reference]         | 1 [Reference]                    | 1 [Reference]                    |
| Any (early or late) | 0.95 (0.71 to 1.26)              | -0.33 (-1.95 to 1.69)            | 0.49 (0.17 to 1.43) | -3.46 (-5.80 to 2.78) | 0.87 (0.43 to 1.76) | -0.85 (-3.91 to 4.81) | 1.29 (0.83 to 2.01)              | 1.89 (-1.14 to 6.25)             |
| Early               | 0.75 (0.54 to 1.04)              | -1.47 (-2.74 to 0.23)            | 0.42 (0.14 to 1.24) | -3.51 (-5.26 to 1.38) | 0.84 (0.40 to 1.74) | -0.97 (-3.60 to 4.10) | 0.93 (0.56 to 1.55)              | -0.39 (-2.61 to 3.11)            |
| Late                | 1.89 (1.00 to 3.59) <sup>b</sup> | 0.71 (0.00 to 2.03) <sup>b</sup> | 0.66 (0.12 to 3.68) | -0.27 (-0.71 to 2.10) | 1.25 (0.19 to 8.36) | 0.20 (-0.65 to 5.56)  | 3.17 (1.36 to 7.40) <sup>b</sup> | 1.71 (0.28 to 4.87) <sup>b</sup> |

Abbreviations: AMD, age-related macular degeneration; CVD, cardiovascular disease; HR, hazard ratio; PAR, population attributable risk.

<sup>a</sup>Adjusted for age, squared age, sex, race/ethnicity, educational attainment, marital status, family income, smoking status, alcohol consumption, diabetes, hypertension, high cholesterol level, body mass index, high C-reactive protein level, depressive symptoms, comorbid ocular diseases, walking disability, self-rated health, history of CVD, and cancer .

<sup>b</sup> $P < .05$

**eTable 4.** Summary Description of Previous Studies on the Association Between Age-Related Macular Degeneration and Mortality

| Study                       | Country | Age range | Sample size | Median follow-up | HR (95% CI)                                                                                                                                                                                                                                                                                             | AMD assessment                                   | Adjustment for covariates                                                                                                                                                                                                                          |
|-----------------------------|---------|-----------|-------------|------------------|---------------------------------------------------------------------------------------------------------------------------------------------------------------------------------------------------------------------------------------------------------------------------------------------------------|--------------------------------------------------|----------------------------------------------------------------------------------------------------------------------------------------------------------------------------------------------------------------------------------------------------|
| AREDS 2004 <sup>[14]</sup>  | USA     | 55-81     | 4753        | 6.5              | <p>All-cause:</p> <p>Category 2 vs 1:1.09 (0.81-1.46)</p> <p>Category 3 vs 1:1.10 (0.85-1.43)</p> <p>Category 4 vs 1:<b>1.41 (1.08-1.86)</b></p> <hr/> <p>CVD-cause:</p> <p>Category 2 vs 1:1.41 (0.83-2.39)</p> <p>Category 3 vs 1:1.45 (0.90-2.33)</p> <p>Category 4 vs 1:<b>1.92 (1.18-3.12)</b></p> | Wisconsin Age-Related Maculopathy Grading System | Age, sex, race, education, smoking status, body mass index, diabetes mellitus, angina, cancer, and hypertension.                                                                                                                                   |
| AREDS2 2017 <sup>[15]</sup> | USA     | 50-80     | 4203        | 5                | <p>All-cause:</p> <p>GA vs Intermediate:1.31 (0.81-2.10)</p> <p>Neovascular vs Intermediate: <b>1.56 (1.21-2.01)</b></p> <p>Simple Scale Score 3 vs 1,2: <b>1.60 (1.07-2.40)</b></p>                                                                                                                    | Wisconsin Age-Related Maculopathy Grading System | Age, gender, race, education, smoking status, diabetes, history of high blood pressure, history of congestive heart failure, history of coronary heart disease, history of myocardial infarction, history of stroke, and antiangiogenic treatment. |



|                           |         |       |      |     |                                                                                                                                                                                                                                                                                                    |                                                  |                                                                   |
|---------------------------|---------|-------|------|-----|----------------------------------------------------------------------------------------------------------------------------------------------------------------------------------------------------------------------------------------------------------------------------------------------------|--------------------------------------------------|-------------------------------------------------------------------|
|                           |         |       |      |     | <p>Simple Scale Score 4 vs 1,2: <b>1.72 (1.19-2.50)</b></p> <hr/> <p>CVD-cause:</p> <p>GA vs Intermediate:1.35 (0.57-3.17)</p> <p>Neovascular vs Intermediate: <b>1.68 (1.04-2.71)</b></p> <p>Simple Scale Score 3 vs 1,2:1.45 (0.69-3.03)</p> <p>Simple Scale Score 4 vs 1,2:1.56 (0.79-3.07)</p> |                                                  |                                                                   |
| AGES 2014 <sup>[13]</sup> | Iceland | 67-96 | 4910 | 8.6 | <p>≥ 83 yrs</p> <p>All-cause:</p> <p>Early vs no AMD:1.21 (0.90-1.62)</p> <p>Late vs no AMD:<b>1.76 (1.20-2.57)</b></p> <hr/> <p>CVD-cause:</p> <p>Early vs no AMD:1.42 (0.94-2.12)</p> <p>Late vs no AMD:<b>2.37 (1.41, 3.98)</b></p>                                                             | Wisconsin Age-Related Maculopathy Grading System | Age, established mortality risk factors, and comorbid conditions. |

|                                                    |           |       |            |     |                                                                                                                                                                                                                                                                                     |                                                  |                                                                                                                                                                                                                                                                                                      |
|----------------------------------------------------|-----------|-------|------------|-----|-------------------------------------------------------------------------------------------------------------------------------------------------------------------------------------------------------------------------------------------------------------------------------------|--------------------------------------------------|------------------------------------------------------------------------------------------------------------------------------------------------------------------------------------------------------------------------------------------------------------------------------------------------------|
| SOF 2015 <sup>[12]</sup>                           | USA       | ≥ 65  | 1202 women | 9.5 | <p>All-cause:</p> <p>Early vs no AMD:1.08 (0.91-1.28)</p> <p>Late vs no AMD:1.04 (0.65-1.68)</p> <p>Any vs no AMD:1.10 (0.93-1.30)</p> <hr/> <p>CVD-cause:</p> <p>Early vs no AMD:1.09 (0.82-1.46)</p> <p>Late vs no AMD:1.66 (0.87-3.18)</p> <p>Any vs no AMD:1.18 (0.89-1.56)</p> | Wisconsin Age-Related Maculopathy Grading System | Age, race, self-reported frailty, body mass index (BMI), Mini-Mental State Examination (MMSE) score, walking speed, history of congestive heart failure (CHF), history of myocardial infarction (MI), history of chronic obstructive pulmonary disease (COPD), and history of thiazide diuretic use. |
| The Copenhagen City Eye Study 2005 <sup>[18]</sup> | Denmark   | 60-80 | 946 women  | 14  | <p>All-cause:</p> <p>Early vs no AMD: <b>1.26 (1.05–1.52)</b></p> <p>Late vs no AMD:1.28 (0.86–1.90)</p> <p>Any vs no AMD:<b>1.26 (1.06–1.51)</b></p>                                                                                                                               | Wisconsin Age-Related Maculopathy Grading System | Age, gender, smoking status, hypertension, cardiovascular disease, and diabetes mellitus.                                                                                                                                                                                                            |
| BMES 2007 <sup>[17]</sup>                          | Australia | > 49  | 3654       | 11  | <p>49-74 yrs</p> <p>All-cause:</p> <p>Any AMD vs no AMD:<b>1.6 (1.0-2.4)</b></p> <p>Early vs no AMD:<b>1.5 (1.0–2.2)</b></p>                                                                                                                                                        | International Classification System              | Age, qualifications, body mass index, smoking status, alcohol consumption, poor self-rated health, walking disability, presence of hypertension and/or diabetes, doctor-diagnosed history of cancer, angina, stroke                                                                                  |

|                                           |           |       |      |    |                                                                                                                                                                                                                                                              |                                                  |                                                                                                                                                                                                                                                              |
|-------------------------------------------|-----------|-------|------|----|--------------------------------------------------------------------------------------------------------------------------------------------------------------------------------------------------------------------------------------------------------------|--------------------------------------------------|--------------------------------------------------------------------------------------------------------------------------------------------------------------------------------------------------------------------------------------------------------------|
|                                           |           |       |      |    | Late vs no AMD: <b>2.5 (1.2–5.0)</b>                                                                                                                                                                                                                         |                                                  | and/or acute myocardial infarction.                                                                                                                                                                                                                          |
|                                           |           |       |      |    | CVD-cause:<br>Any AMD vs no AMD:1.4 (0.6-3.1)<br>Early vs no AMD:1.4 (0.7–2.7)<br>Late vs no AMD: <b>3.80 (1.4-10.4)</b>                                                                                                                                     |                                                  |                                                                                                                                                                                                                                                              |
| BMES 2016 <sup>[19]</sup>                 | Australia | > 49  | 3654 | 15 | All-cause:<br>Any AMD vs no AMD:1.07 (0.87 – 1.32)<br>Early vs no AMD:1.02 (0.80 – 1.31)<br>Late vs no AMD:1.08 (0.79 – 1.49)<br>CVD-cause:<br>Any AMD vs no AMD:0.95 (0.73–1.25)<br>Early vs no AMD:0.82 (0.58 – 1.16)<br>Late vs no AMD:1.20 (0.82 – 1.75) | International Classification System              | Age, sex, qualifications, body mass index, smoking status, alcohol consumption, poor self-rated health, walking disability, presence of hypertension and/or diabetes, doctor-diagnosed history of cancer, angina, stroke and/or acute myocardial infarction. |
| Beaver Dam Eye Study 2012 <sup>[16]</sup> | USA       | 43-84 | 4926 | 20 | All-cause:<br>Late vs no AMD: <b>1.37 (1.15-1.62)</b>                                                                                                                                                                                                        | Wisconsin Age-Related Maculopathy Grading System | Age and sex.                                                                                                                                                                                                                                                 |

|                                           |           |       |      |      |                                                                                                 |                                                  |                                                                                                                                                                                                                                                       |
|-------------------------------------------|-----------|-------|------|------|-------------------------------------------------------------------------------------------------|--------------------------------------------------|-------------------------------------------------------------------------------------------------------------------------------------------------------------------------------------------------------------------------------------------------------|
| SiMES 2015 <sup>[22]</sup>                | Singapore | 40-79 | 3280 | 7.24 | All-cause:<br>Early vs no AMD:1.08 (0.71-1.55)<br>Late vs no AMD:0.82 (0.34-1.80)               | Wisconsin Age-Related Maculopathy Grading System | Age, gender, socio-economic status, hypertension, smoking, BMI and cardiovascular disease.                                                                                                                                                            |
| Beaver Dam Eye Study 2006 <sup>[20]</sup> | USA       | 43-84 | 4926 | 13.2 | All-cause:<br>AMD per 1-step increase in severity: 0.97 (0.87-1.07)                             | Wisconsin Age-Related Maculopathy Grading System | Age, sex, proteinuria, history of cancer, BMI, BMI2, ratio of total to high-density lipoprotein cholesterol level, smoking, pulse rate, diabetes status, cardiovascular disease history, sedentary lifestyle, education, and systolic blood pressure. |
| Beijing Eye Study 2008 <sup>[24]</sup>    | China     | ≥ 40  | 4439 | 5    | All-cause:<br>Early vs no AMD:1.10 (0.43-2.84)<br>Late vs no AMD:2.81 (0.36-21.89)              | International Classification and Grading System  | Age and hyperopic refractive error.                                                                                                                                                                                                                   |
| VIP 2000 <sup>[25]</sup>                  | Australia | ≥ 40  | 3271 | 5    | All-cause:<br>Present vs absent:1.36 (0.96-1.94)                                                | International Classification and Grading System  | Age, sex, duration of smoking, duration of high-blood pressure, and arthritis.                                                                                                                                                                        |
| APEDS 2013 <sup>[40]</sup>                | Indian    | ≥ 30  | 4188 | 11   | All-cause:<br>Any cataract and AMD:1.26 (0.80-1.98)<br>Lens morphology and AMD:1.25 (0.79-1.97) |                                                  |                                                                                                                                                                                                                                                       |

|                                                                    |     |       |       |     |                                                                                               |                                                                  |                                                                                                                                                                                                                                                                |
|--------------------------------------------------------------------|-----|-------|-------|-----|-----------------------------------------------------------------------------------------------|------------------------------------------------------------------|----------------------------------------------------------------------------------------------------------------------------------------------------------------------------------------------------------------------------------------------------------------|
| The Rotterdam Study 2003 <sup>[21]</sup>                           | USA | ≥ 55  | 6339  | 7.0 | All-cause:<br>Early vs no AMD:0.96 (0.71-1.29)<br>Late vs no AMD:0.94 (0.52-1.68)             | International Classification and Grading System                  | Age, gender, atherosclerosis, hypertension, diabetes mellitus, smoking, history of cardiovascular disease, body mass index, and cholesterol level.                                                                                                             |
| The United Kingdom 2005 <sup>[23]</sup>                            | UK  | ≥ 75  | 3201  | 6.1 | All-cause:<br>Late vs no AMD:1.01(0.81-1.25)<br>CVD-cause:<br>Late vs no AMD:1.03 (0.72–1.45) | Glasgow acuity cards, questionnaire and the Ophthalmologist rank | Age and sex.                                                                                                                                                                                                                                                   |
| The Atherosclerosis Risk in Communities Study 2007 <sup>[41]</sup> | USA | 49-73 | 12536 | 10  | All-cause:<br>Early vs no AMD:0.95 (0.73-1.31)                                                | Wisconsin Age-Related Maculopathy Grading System                 | Age, sex, race, and field center, education, systolic blood pressure, diastolic blood pressure, diabetes, all-cause plasma cholesterol, triglyceride, glucose, high-density lipoprotein cholesterol, pack-years of cigarette smoking, and current alcohol use. |

Abbreviations: AREDS, Age-Related Eye Disease Study; AREDS2, Age-Related Eye Disease Study 2; AGES, The Age, Gene/Environment Susceptibility Reykjavik Study; SOF, Study of Osteoporotic Fractures; BMES, Blue Mountains Eye Study; SiMES, Singapore Malay Eye Study; VIP, Visual Impairment Project; BMI, body mass index; CVD, cardiovascular disease; GA, geographic atrophy.
